# Supplementary material for: Does Motor Imagery Training Improve Service Performance in Tennis Players? A Systematic Review and Meta-Analysis
Source: MDPI journal article supplement (doi:10.3390/bs14030207), 2024-03-05
Supplement: s1 [file s1]

Table S2

The data used for meta-analyses

| Reference                | Test                    | EG         |       | EG          |       | N  | CG         |       | CG          |       | N  |
|--------------------------|-------------------------|------------|-------|-------------|-------|----|------------|-------|-------------|-------|----|
|                          |                         | (pre-test) |       | (post-test) |       |    | (pre-test) |       | (post-test) |       |    |
|                          |                         | Mean       | SD    | Mean        | SD    |    | Mean       | SD    | Mean        | SD    |    |
| Atienza et al., 1998     | Service accuracy        | 28.12      | 2.21  | 29.37       | 3.54  | 4  | 27.62      | 1.7   | 26.5        | 3.53  | 4  |
|                          | Service speed           | 37.62      | 6.54  | 40.62       | 12.32 | 4  | 34.25      | 4.7   | 34.25       | 7.1   | 4  |
|                          | Service technique       | 4.66       | 0.18  | 5.39        | 0.35  | 4  | 4.38       | 0.14  | 4.63        | 0.23  | 4  |
| Robin et al., 2007 EG1   | Service speed           | 146.2      | 5.5   | 146.6       | 6.7   | 10 | 145.1      | 5.8   | 144.4       | 6.1   | 5  |
|                          | Service return accuracy | 3.8        | 1.2   | 3.4         | 0.9   | 10 | 3.4        | 1.1   | 3.5         | 1     | 5  |
| Robin et al., 2007 EG2   | Service speed           | 144.7      | 5.7   | 166.1       | 6.4   | 10 | 145.1      | 5.8   | 144.4       | 6.1   | 5  |
|                          | Service return accuracy | 3.5        | 1.2   | 3.6         | 0.9   | 10 | 3.4        | 1.1   | 3.5         | 1     | 5  |
| Coelho et al., 2007      | Serve accuracy          | 10.8       | 2.2   | 12.3        | 2.1   | 23 | 10.4       | 1.9   | 10.3        | 1.9   | 25 |
|                          | Service return accuracy | 10.9       | 2.4   | 10.7        | 2.2   | 23 | 11.2       | 2.5   | 11.2        | 2.4   | 25 |
| Guillot et al., 2012 EG1 | Service speed           | 30.67      | 5.37  | 31.91       | 5.71  | 8  | 30.97      | 1.92  | 32.11       | 2.9   | 4  |
|                          | Service return accuracy | 12.38      | 4.03  | 10.63       | 4.84  | 8  | 7.71       | 5.35  | 6.57        | 3.1   | 4  |
| Guillot et al., 2012 EG2 | Service speed           | 34.32      | 6.41  | 36.34       | 5.82  | 7  | 30.97      | 1.92  | 32.11       | 2.9   | 3  |
|                          | Serve accuracy          | 10.57      | 5.16  | 12.57       | 4.12  | 7  | 7.71       | 5.35  | 6.57        | 3.1   | 3  |
| Dana et al., 2017 EG1    | Service accuracy        | 183.91     | 38.5  | 73.83       | 21.3  | 12 | 195.25     | 34.9  | 134.83      | 28.1  | 6  |
| Dana et al., 2017 EG2    | Service accuracy        | 197.16     | 38.3  | 100.83      | 31.1  | 12 | 195.25     | 34.9  | 134.83      | 28.1  | 6  |
| Fortes et al., 2019      | Service accuracy        | 25.6       | 3.1   | 28.7        | 3.5   | 14 | 24.2       | 3.8   | 24.3        | 3.6   | 14 |
|                          | Service speed           | 117.2      | 8     | 125.6       | 7.3   | 14 | 115.7      | 9.4   | 118.1       | 8.7   | 14 |
| Robin et al., 2022 EG1   | Service speed           | 145.7      | 5.7   | 150.2       | 3.9   | 11 | 143.3      | 4.5   | 146.6       | 5.2   | 6  |
|                          | Service accuracy        | 41.79      | 33.43 | 55.19       | 18.94 | 11 | 43.20      | 33.43 | 48.66       | 20.06 | 6  |
| Robin et al., 2022 EG2   | Service speed           | 146.90     | 6.10  | 148.50      | 4.80  | 11 | 143.30     | 4.50  | 146.60      | 5.20  | 5  |
|                          | Service accuracy        | 40.73      | 32.87 | 60.48       | 16.16 | 11 | 43.20      | 33.43 | 48.66       | 20.06 | 5  |

|                          |                   |          |          |               |               |    |       |       |       |       |   |
|--------------------------|-------------------|----------|----------|---------------|---------------|----|-------|-------|-------|-------|---|
| Robin et al., 2023 EG1   | Service accuracy  | 1.91     | 0.67     | 5.18          | 1.11          | 11 | 2.27  | 1.14  | 2.55  | 1.44  | 6 |
|                          | Service speed     | 80.57    | 34.12    | 92.55         | 29.45         | 11 | 55.71 | 23.63 | 64.64 | 20.64 | 6 |
|                          | Service technique | 2.41     | 0.37     | 2.90          | 0.39          | 11 | 2.06  | 0.44  | 2.12  | 0.35  | 6 |
| Robin et al., 2023 EG2   | Service accuracy  | 2.36     | 0.48     | 4.64          | 0.77          | 11 | 2.27  | 1.14  | 2.55  | 1.44  | 5 |
|                          | Service speed     | 82.00    | 23.71    | 92.64         | 22.32         | 11 | 55.71 | 23.63 | 64.64 | 20.64 | 5 |
|                          | Service technique | 2.42     | 0.51     | 2.72          | 0.37          | 11 | 2.06  | 0.44  | 2.12  | 0.35  | 5 |
| <b>Other data format</b> |                   | <b>F</b> | <b>p</b> | <b>EG (N)</b> | <b>CG (N)</b> |    |       |       |       |       |   |
| Fekih et al., 2020       | Service speed     | 0.19     | 0.667    | 18            | 20            |    |       |       |       |       |   |
|                          | Service accuracy  | 10.52    | 0.003    | 18            | 20            |    |       |       |       |       |   |

EG, experimental group; CG, control group
